# Supplementary material for: The Secreted Proteins of Achlya hypogyna and Thraustotheca clavata Identify the Ancestral Oomycete Secretome and Reveal Gene Acquisitions by Horizontal Gene Transfer
Source: PubMed Central journal article supplement (PMC4316629; doi:10.1093/gbe/evu276), 2014-12-18

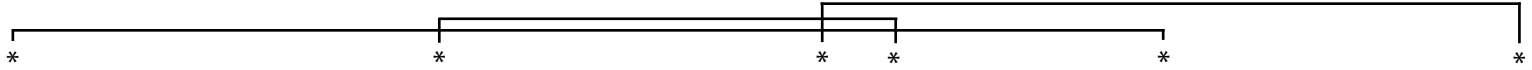

- 1. ACHHYP\_00687\*
- 2. ACHHYP\_00689\*
- 3. ACHHYP\_03599\*
- 4. ACHHYP\_04414
- 5. ACHHYP\_06115
- 6. ACHHYP\_07959
- 7. THRCLA\_11203
- 8. THRCLA\_11204
- 9. THRCLA\_01689\*
- 10. THRCLA\_05061\*
- 11. SPRG\_04384T0
- 12. SPRG\_04168T0
- 13. SPRG\_04167T0
- 14. SPRG\_13072T0
- 15. SPRG\_15859T0
- 16. ACHHYP\_12792
- 17. ACHHYP\_14321\*
- 18. THRCLA\_11549
- 19. SPRG\_14023T0
- 20. SPRG\_03101T0
- 21. PYU1\_T012502
- 22. PYU1\_T011089
- 23. PYU1\_T009879
- 24. PYU1\_T009797
- 25. PYU1\_T009222
- 26. PYU1\_T009895
- 27. PYU1\_T009894
- 28. PYU1\_T009821
- 29. PYU1\_T008920
- 30. PYU1\_T008919
- 31. PYU1\_T008918
- 32. PYU1\_T008907
- 33. PYU1\_T008435
- 34. PYU1\_T008434
- 35. PYU1\_T008432
- 36. PYU1\_T005237
- 37. PYU1\_T002858
- 38. PITG\_23095
- 39. PITG\_22847
- 40. PITG\_22846
- 41. PITG\_22845
- 42. PITG\_22741
- 43. PITG\_21410
- 44. PITG\_16907
- 45. PITG\_16873
- 46. PITG\_16872
- 47. PITG\_12562
- 48. PITG\_12561
- 49. PITG\_12556
- 50. PITG\_12551
- 51. PITG\_08143
- 52. AC2VRR\_s00136g103
- 53. AC2VRR\_s00008g273

Sequence alignment showing amino acid residues for each entry. The alignment is color-coded to highlight conserved regions. Asterisks (\*) above the alignment indicate specific clades or nodes. The sequences are aligned in a way that shows their evolutionary relationships, with closely related sequences grouped together.

OG5\_173373

1. PITG\_20412
2. PITG\_20413
3. PYU1\_T010337
4. THRCLA\_04403°
5. SPRG\_16448T0

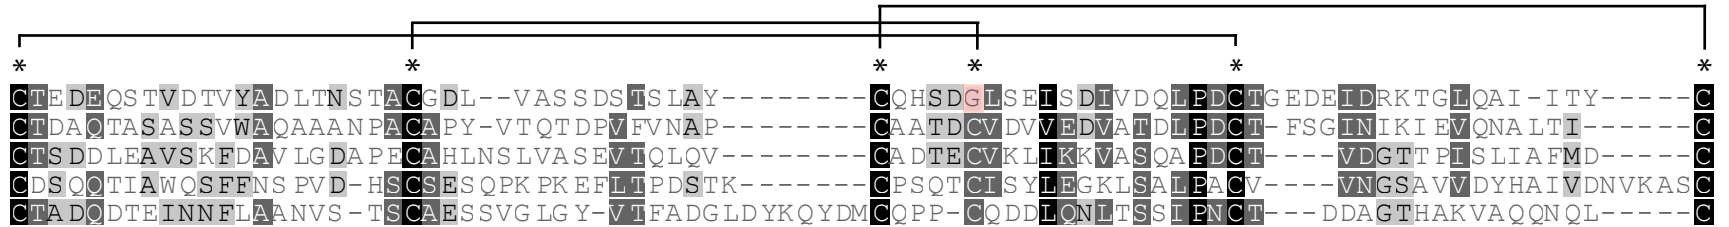

OG5\_184829

1. ACHHYP\_08659
2. SPRG\_04087T0
3. PITG\_01024
4. PYU1\_T001844

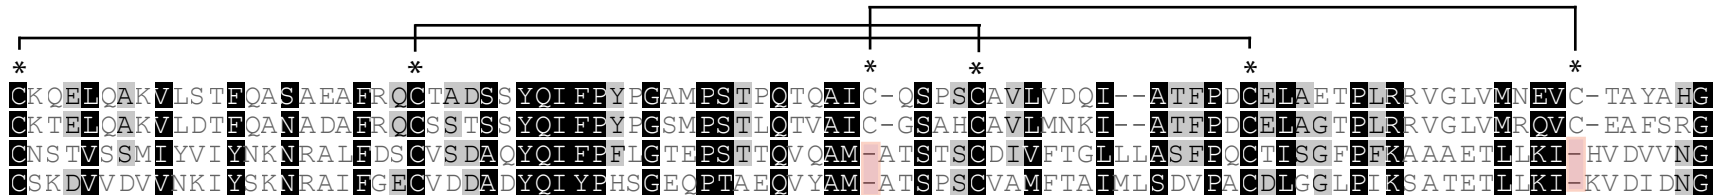

OG5\_184830

1. ACHHYP\_06054°
2. AC2VRR\_s00023g85
3. AC2VRR\_s00023g95
4. AC2VRR\_s00023g107
5. AC2VRR\_s00023g129
6. PYU1\_T010721
7. PYU1\_T010722
8. PITG\_15497

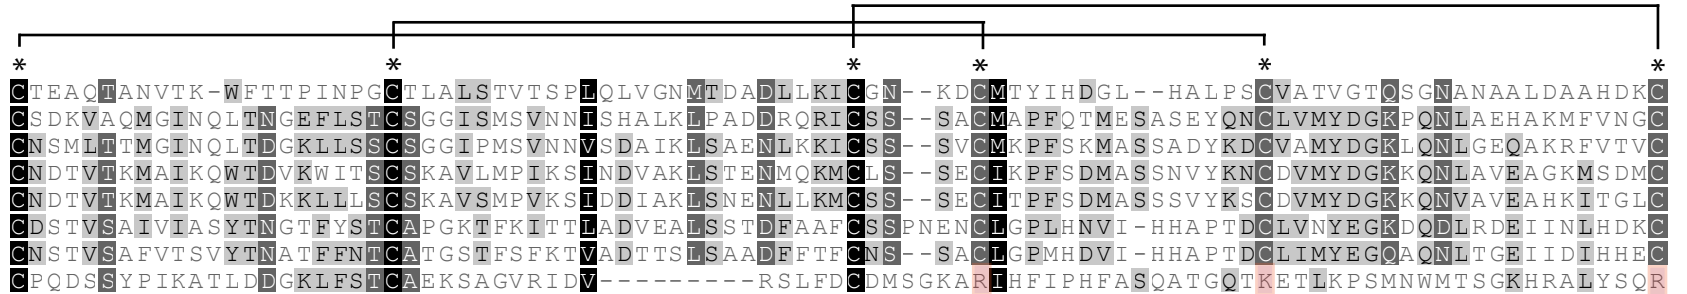

OG5\_244191

1. AC2VRR\_s00243g170
2. THRCLA\_02002
3. PITG\_03613

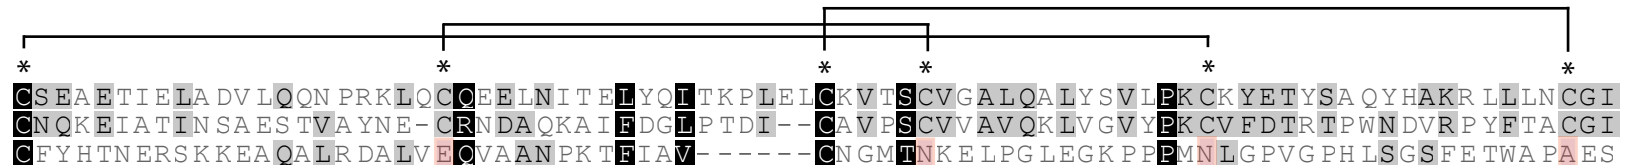

SI Figure 3

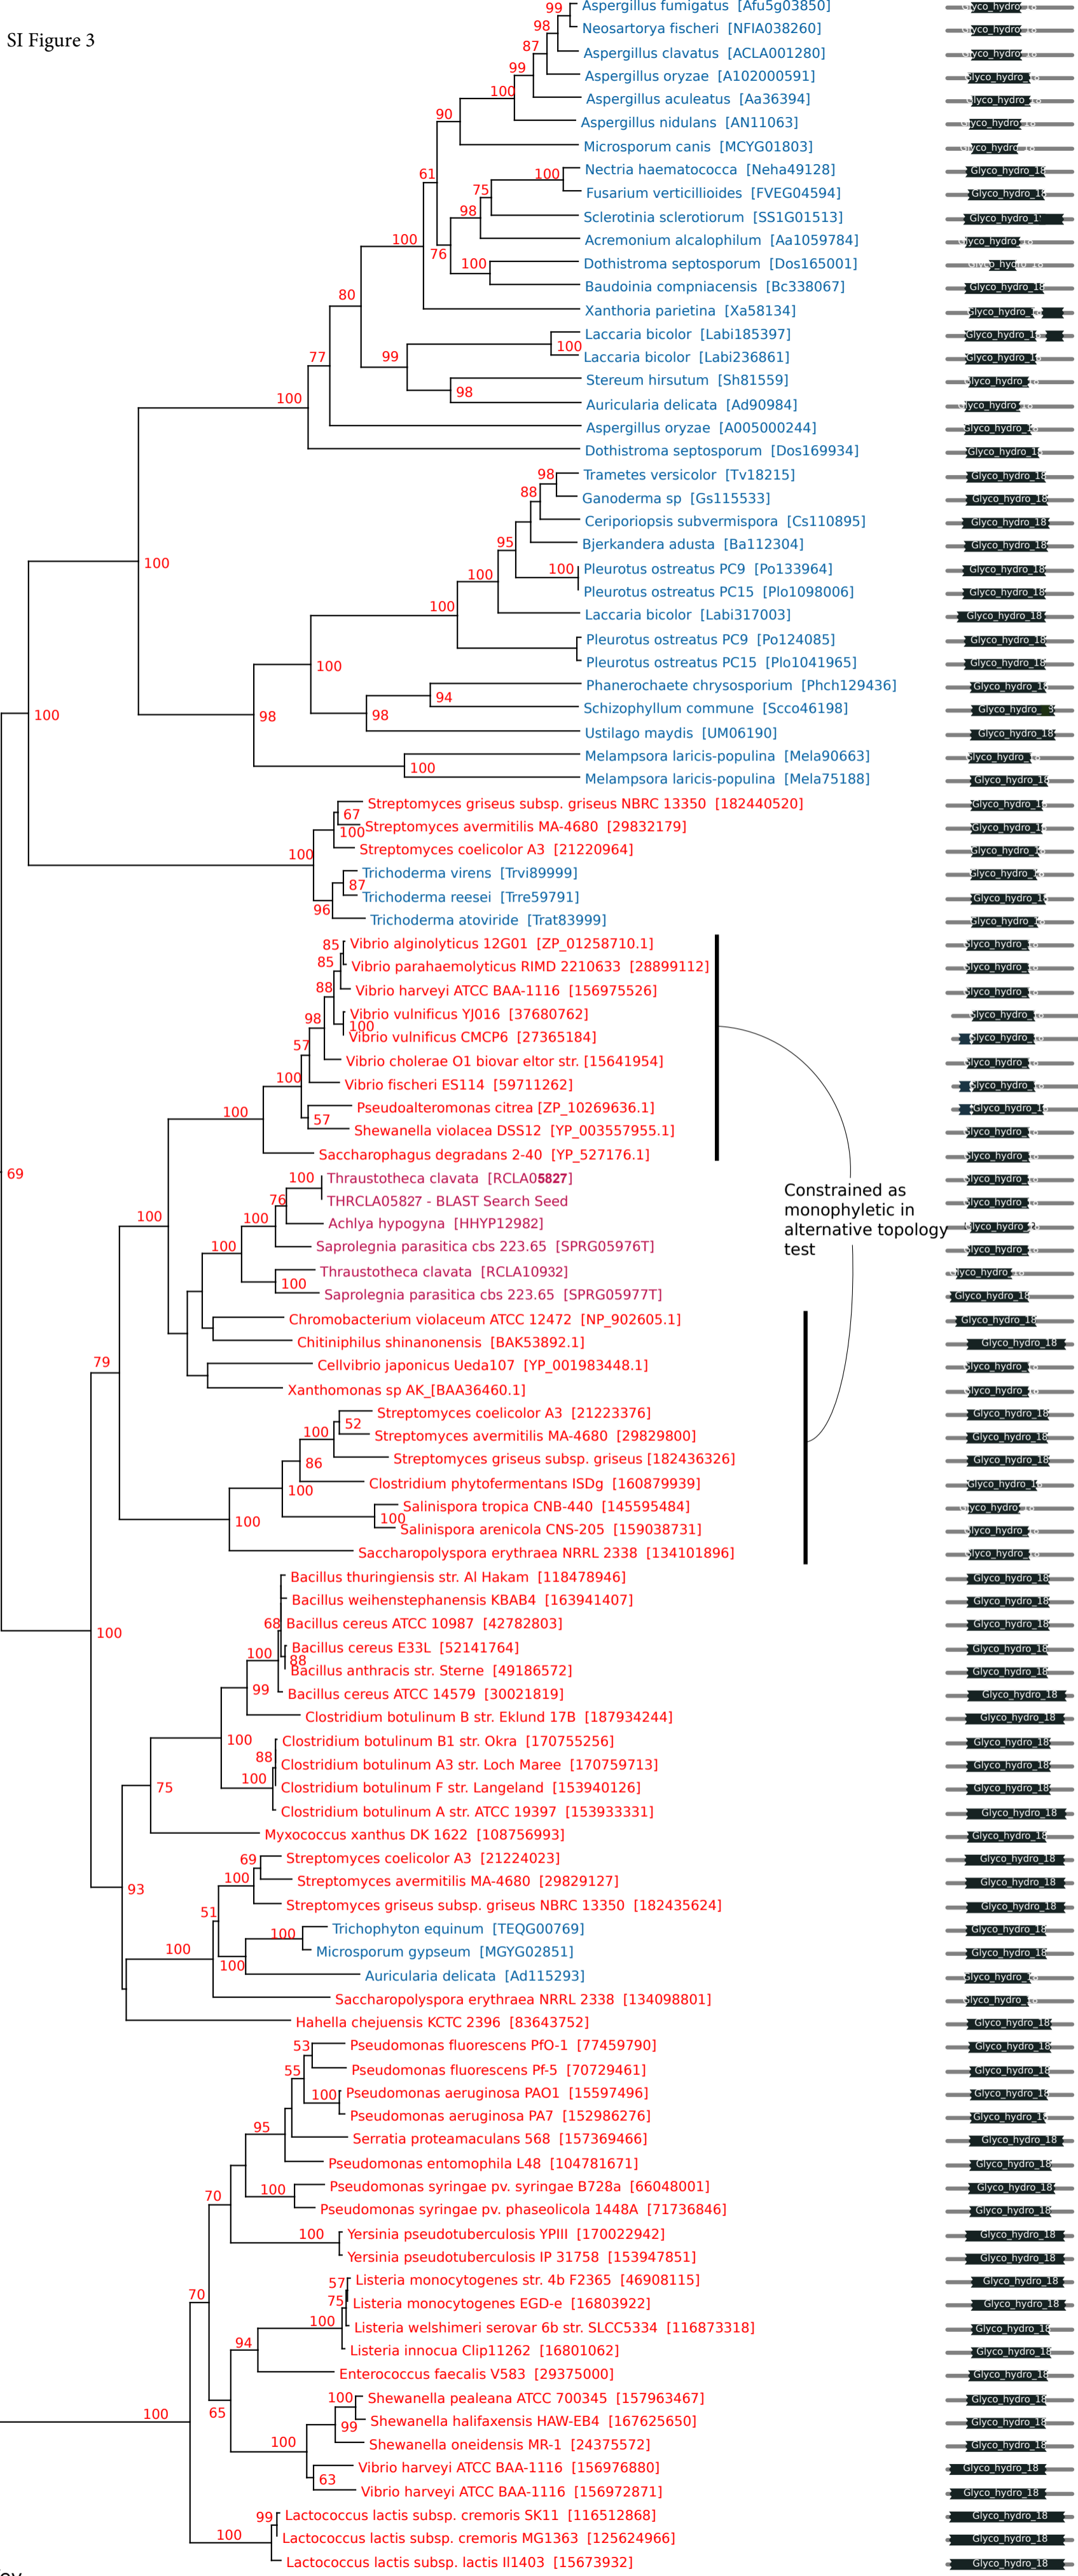

Key  
 viridiplantae  
 metazoa  
 fungi  
 microsporidia  
 stramenopiles  
 bacteria

0.1

SI Figure 4

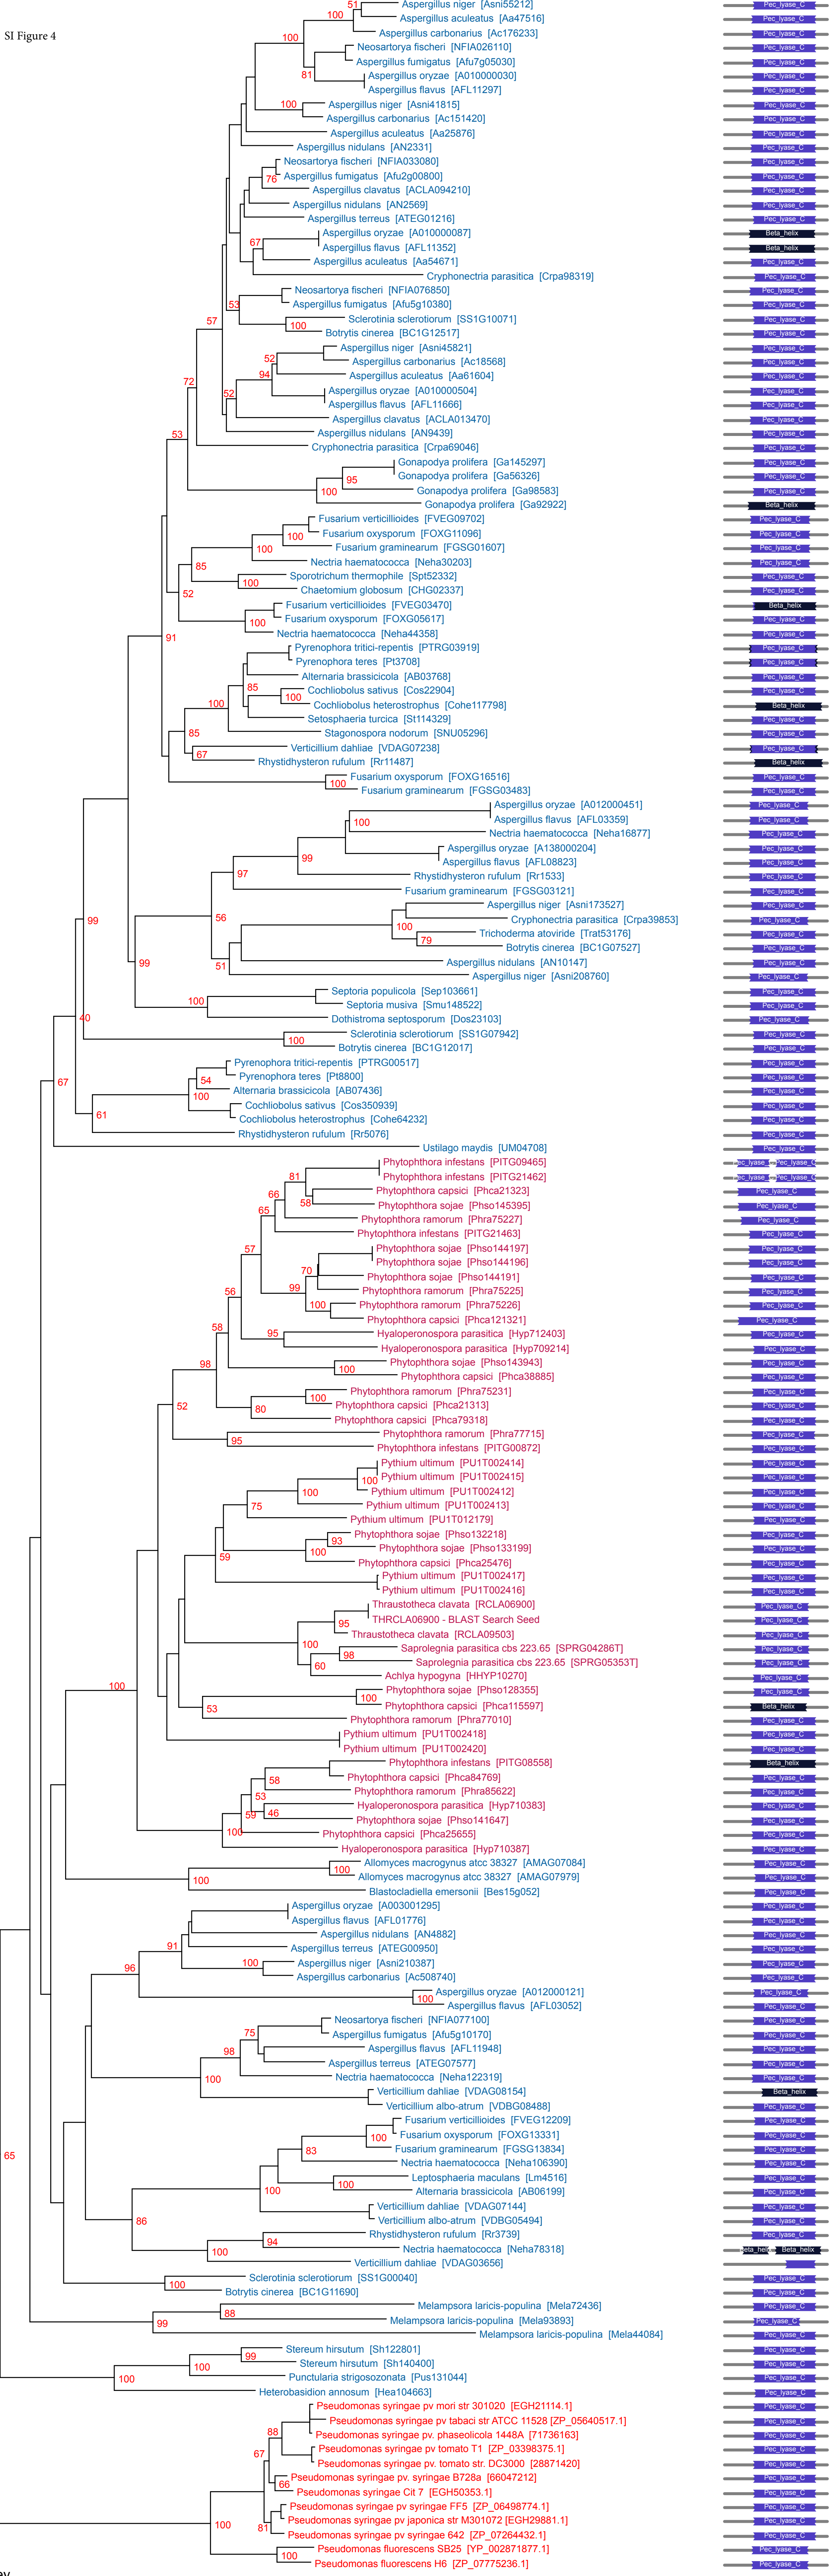

SI Figure 5

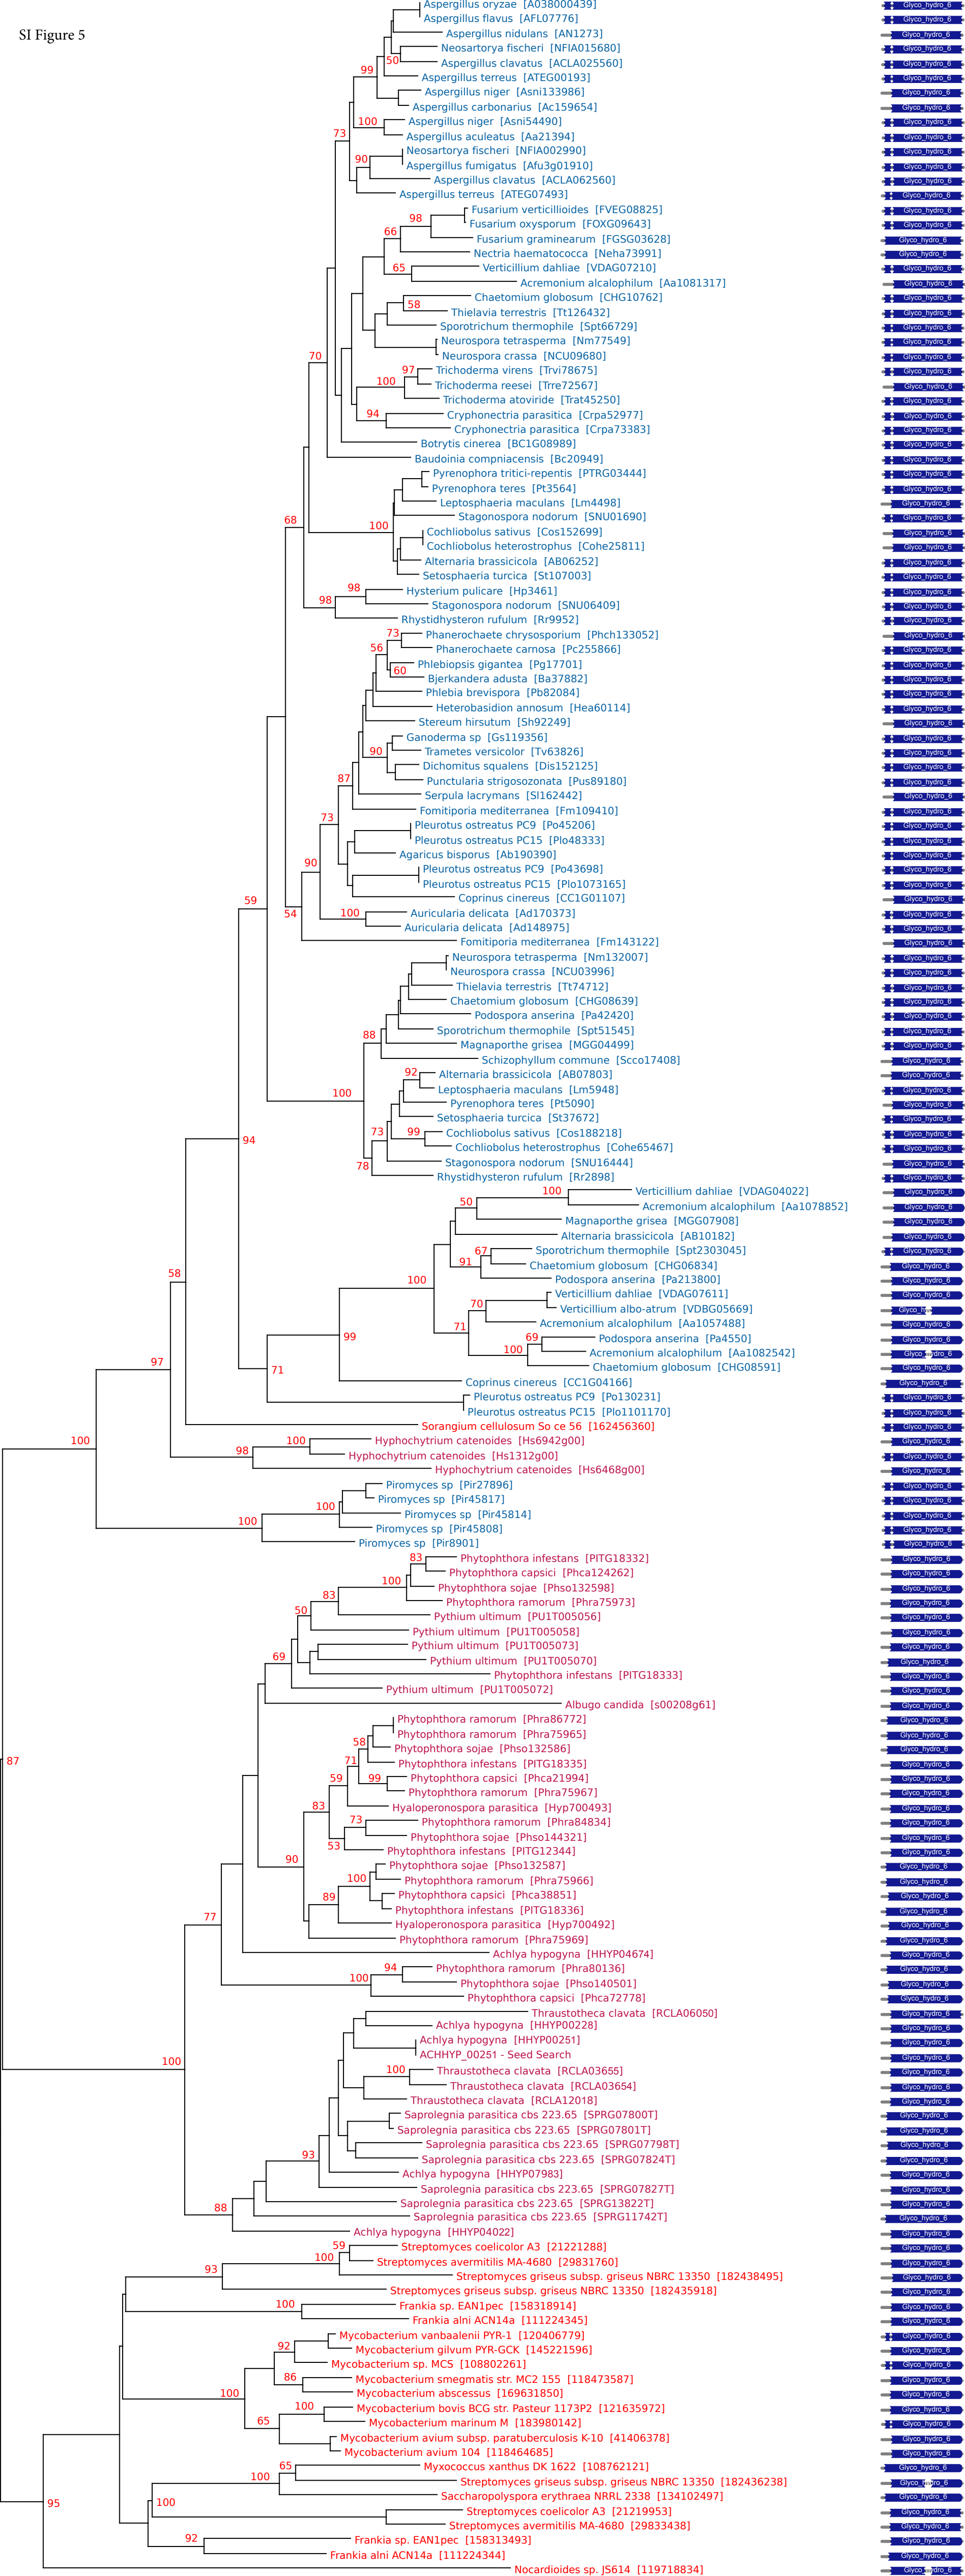

SI Figure 6

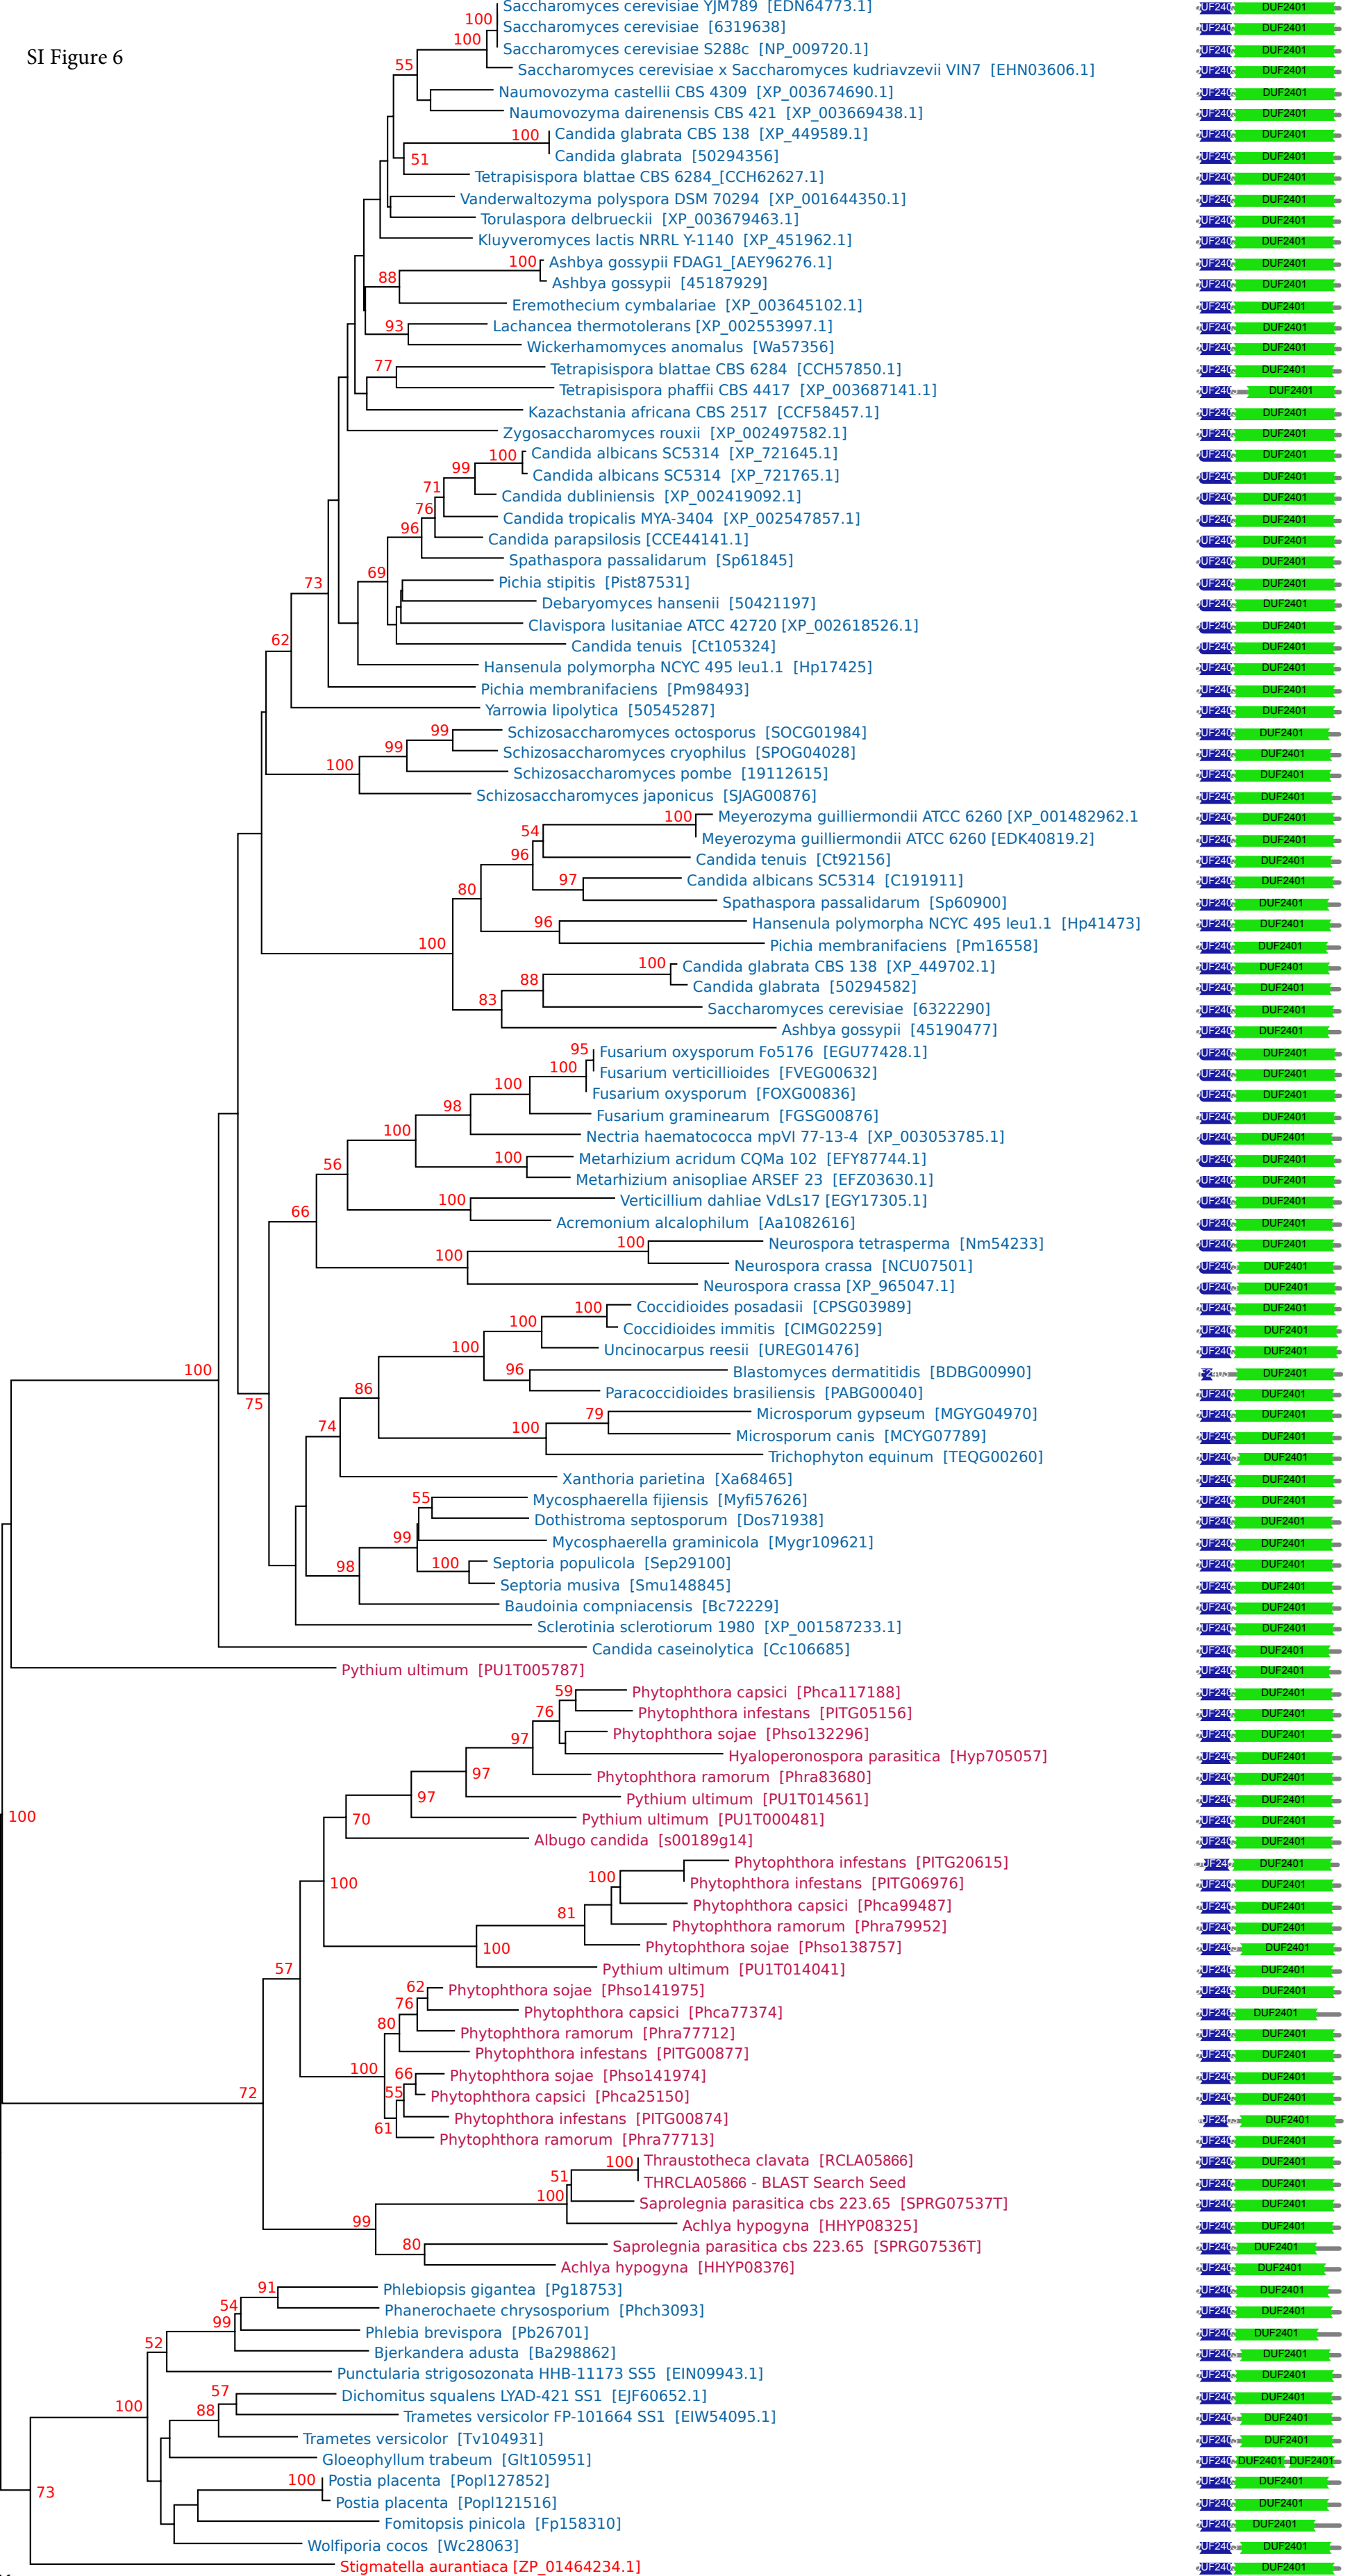

Key

fungi  
stramenopiles

0.1

SI Figure 7

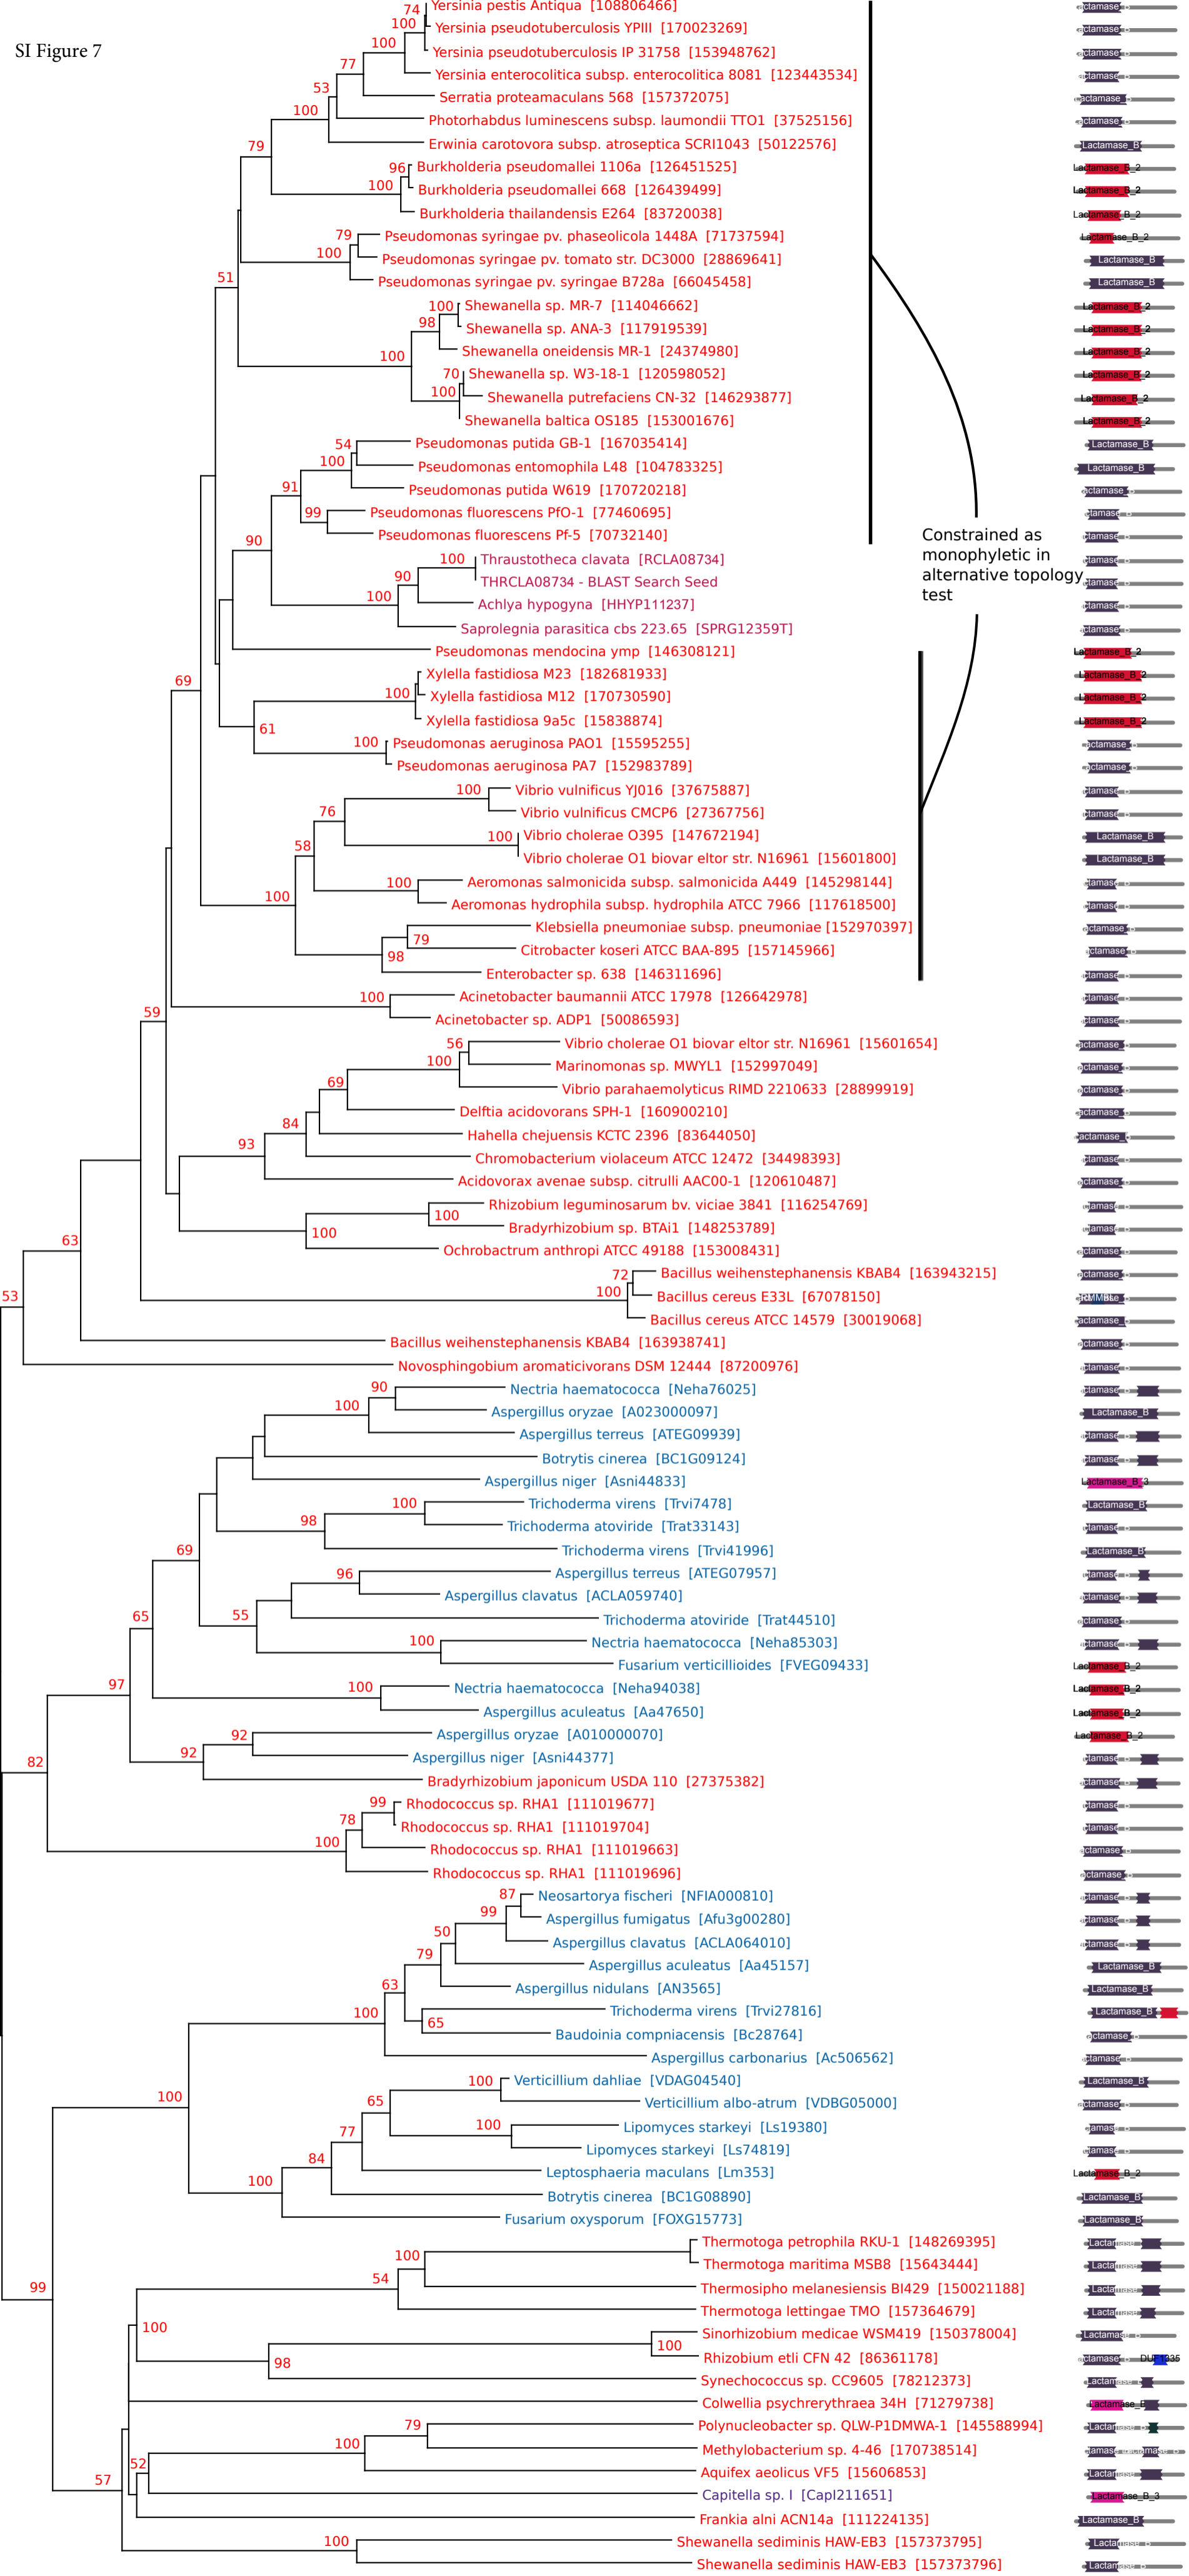

Constrained as monophyletic in alternative topology test

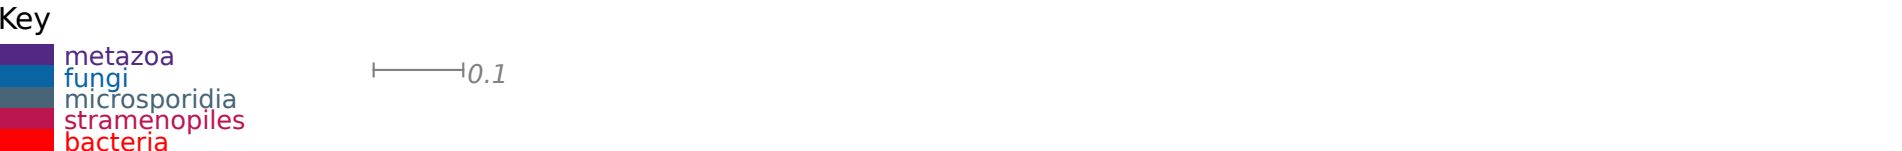

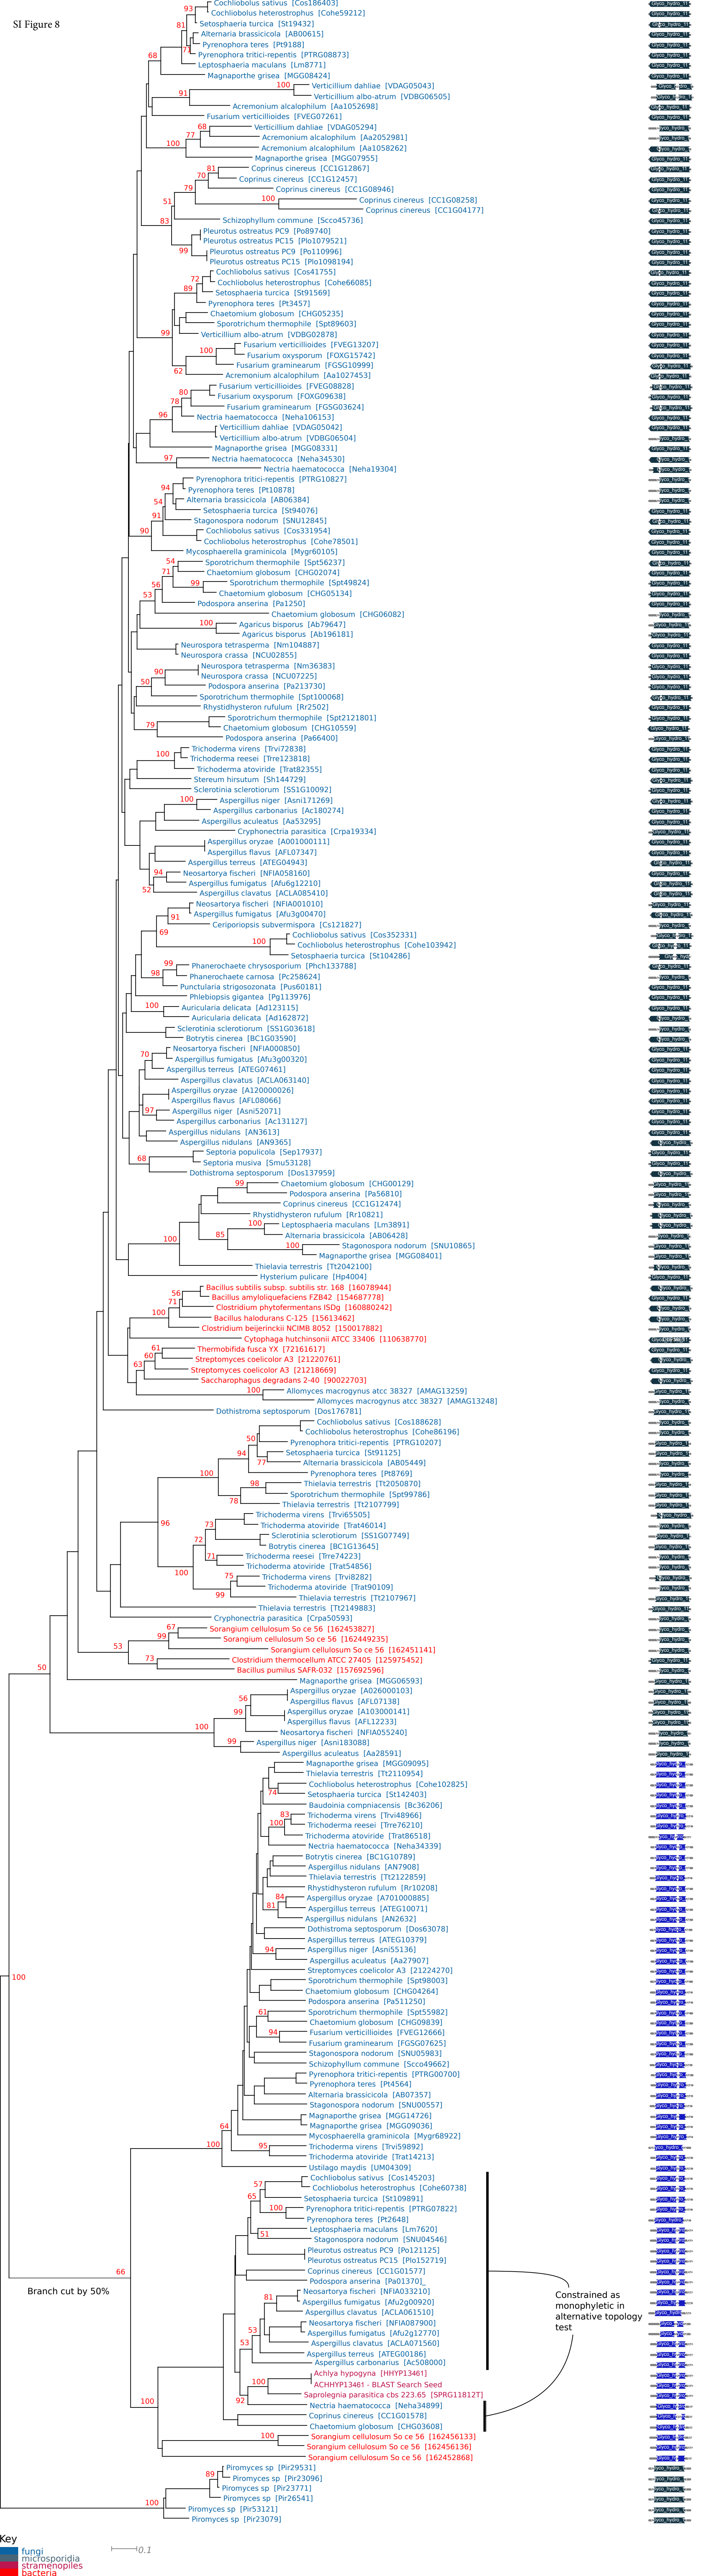



SI Figure 9

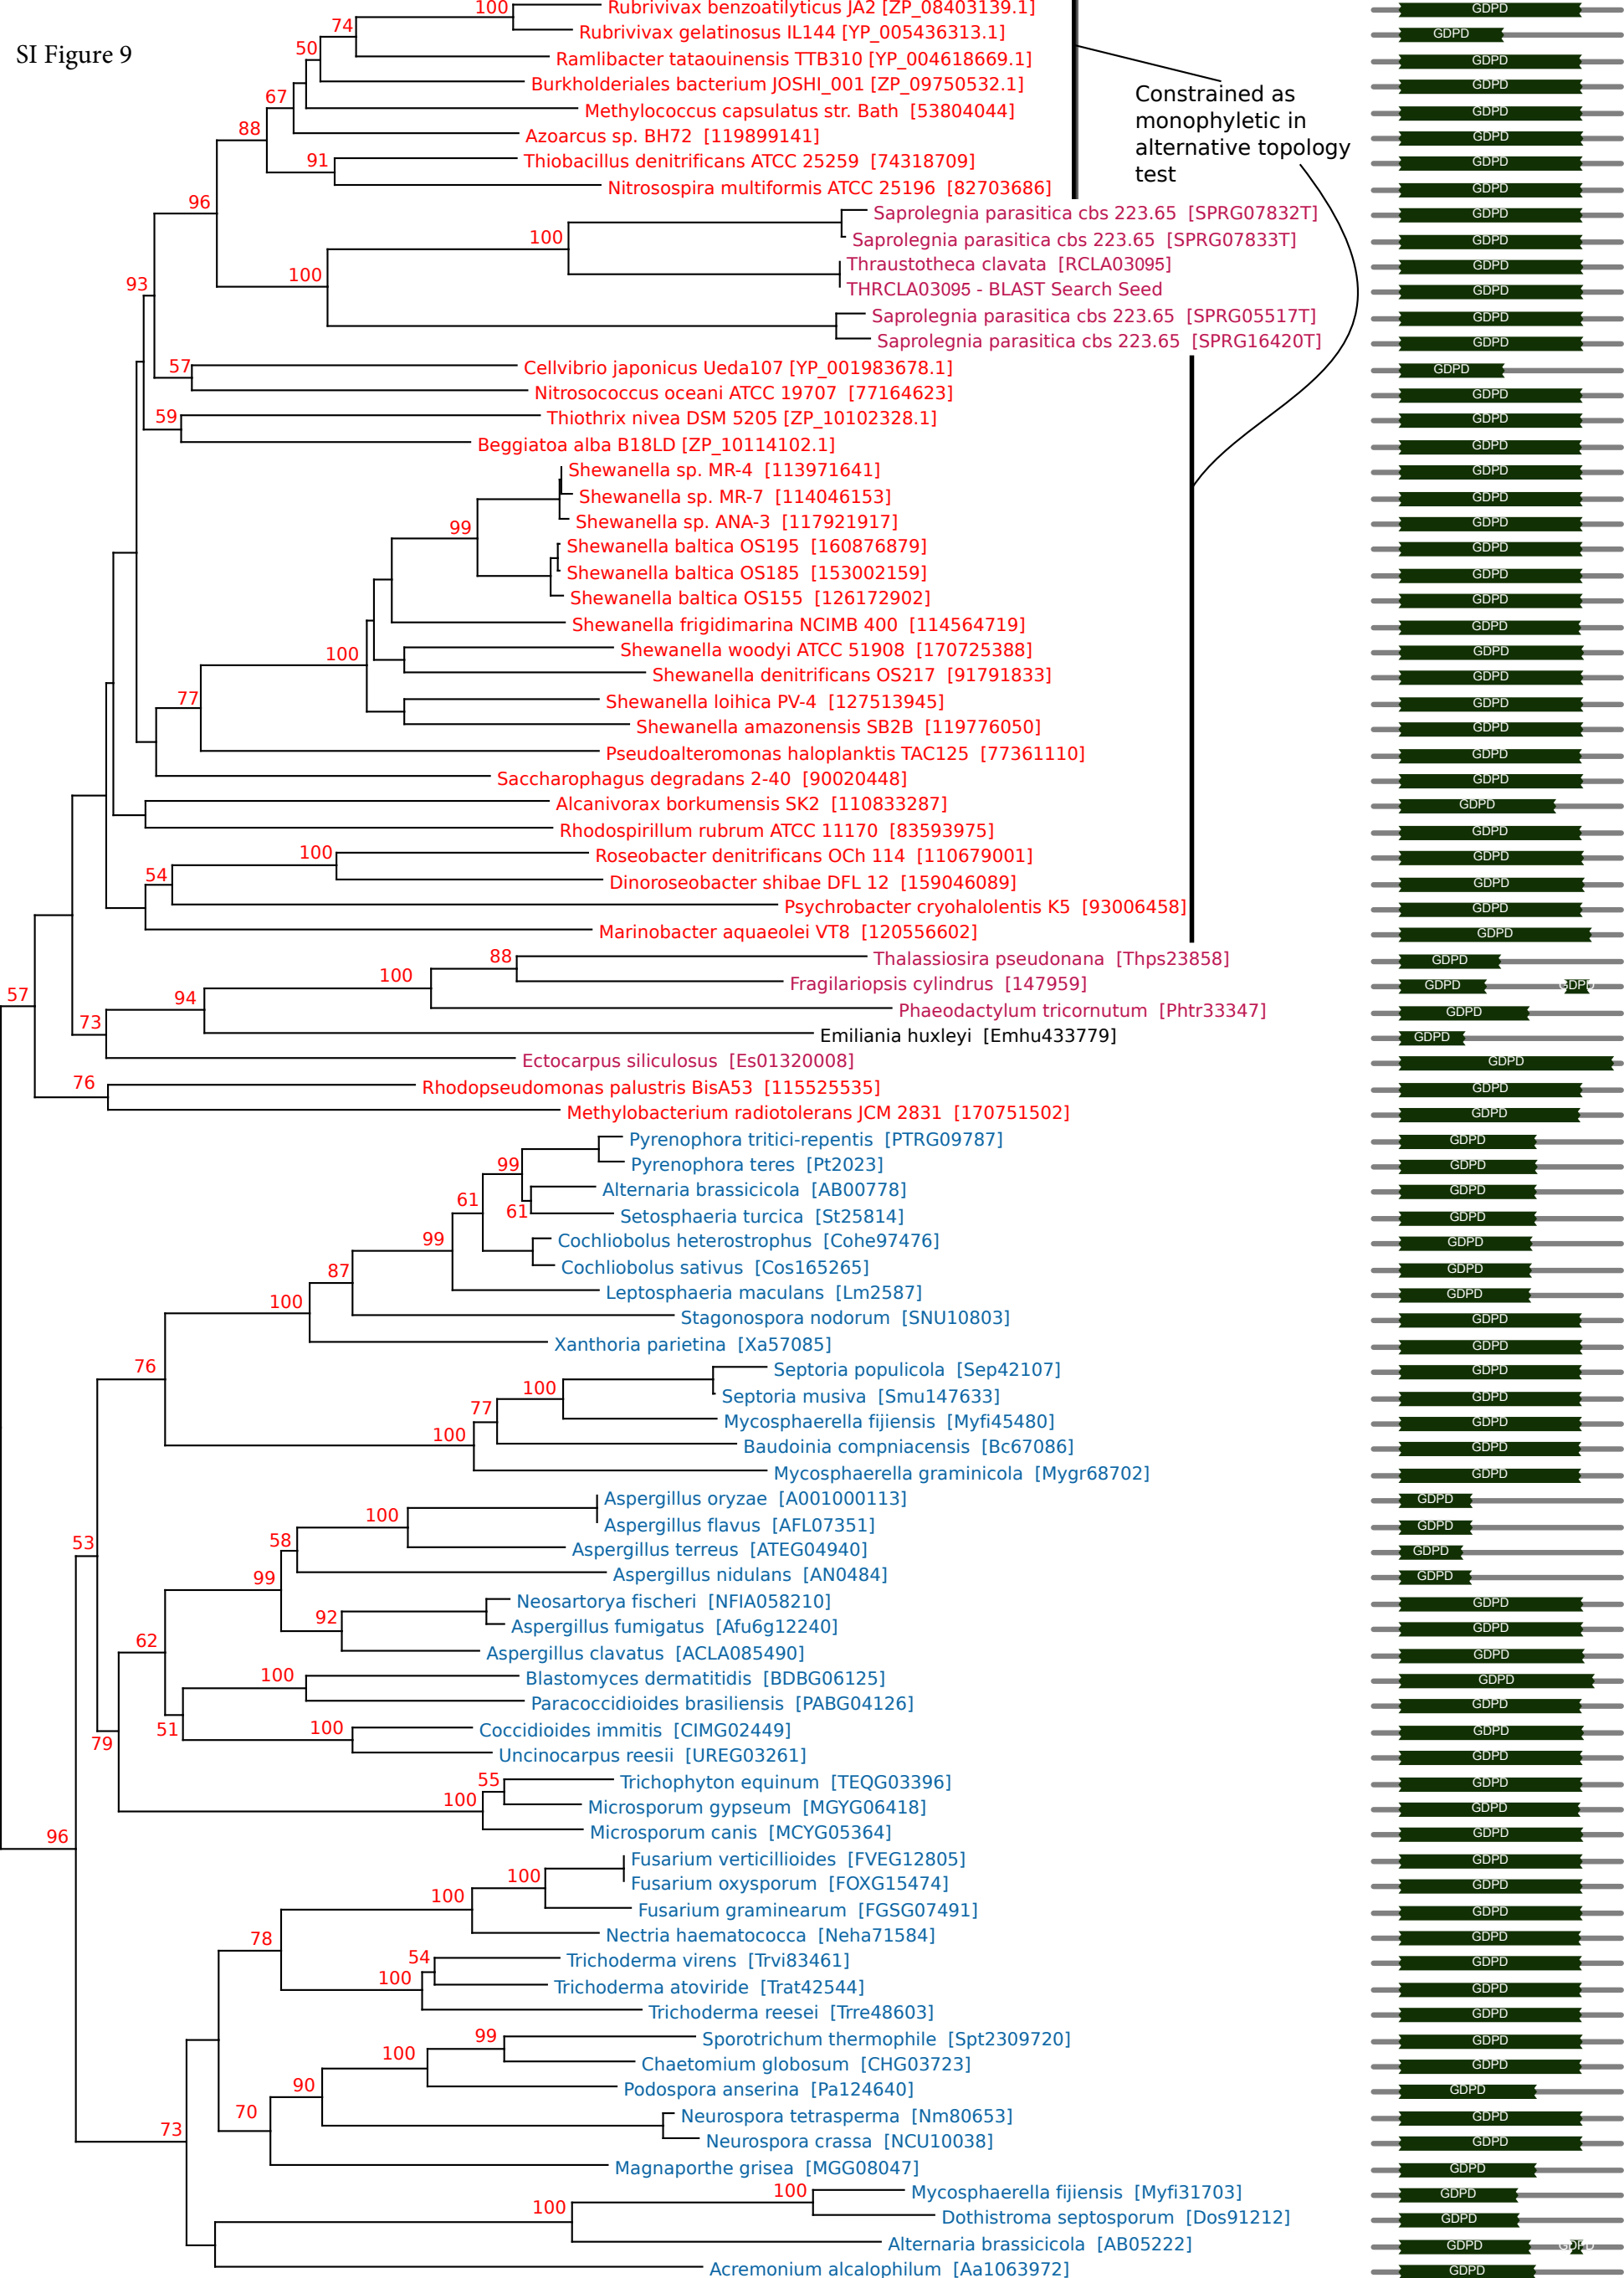

SI Figure 10

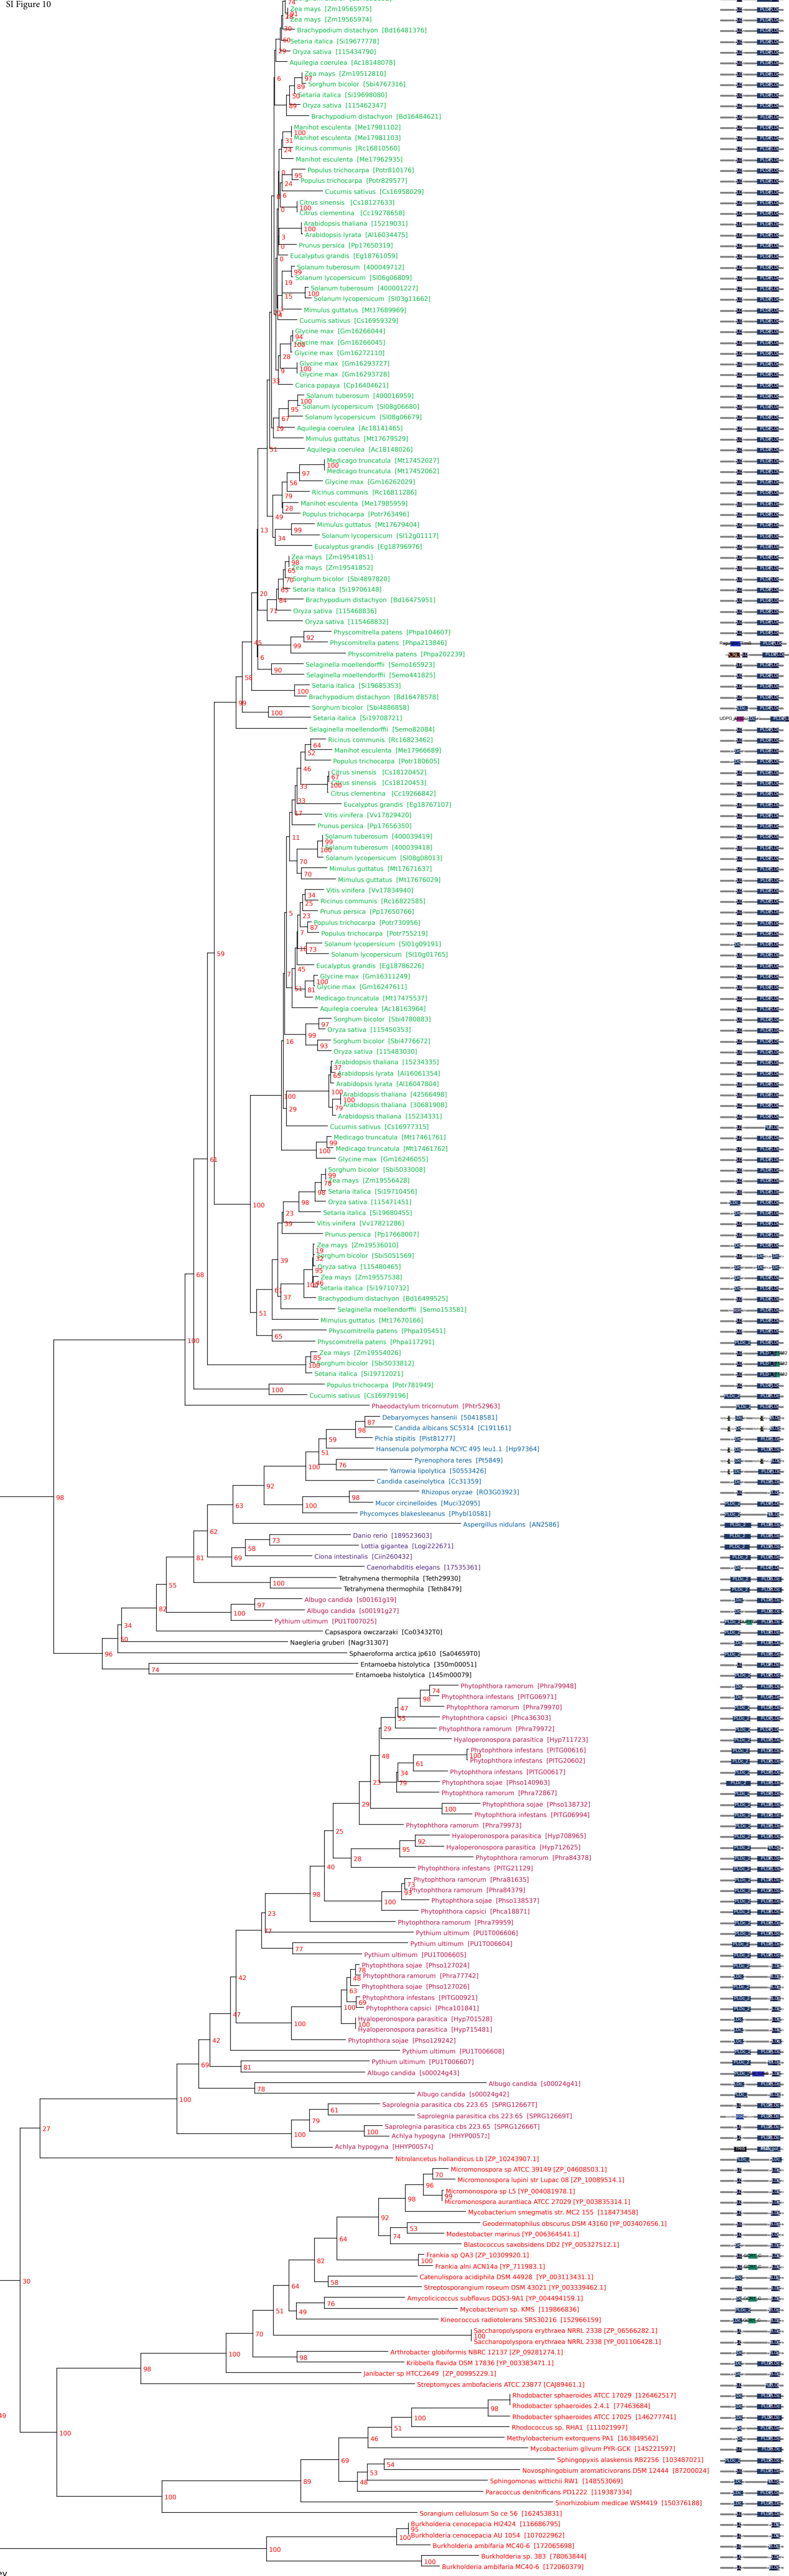

Key  
 viridiplantae  
 metazoa  
 fungi  
 microsporidia  
 stramenopiles  
 bacteria

0.1

SI Figure 11

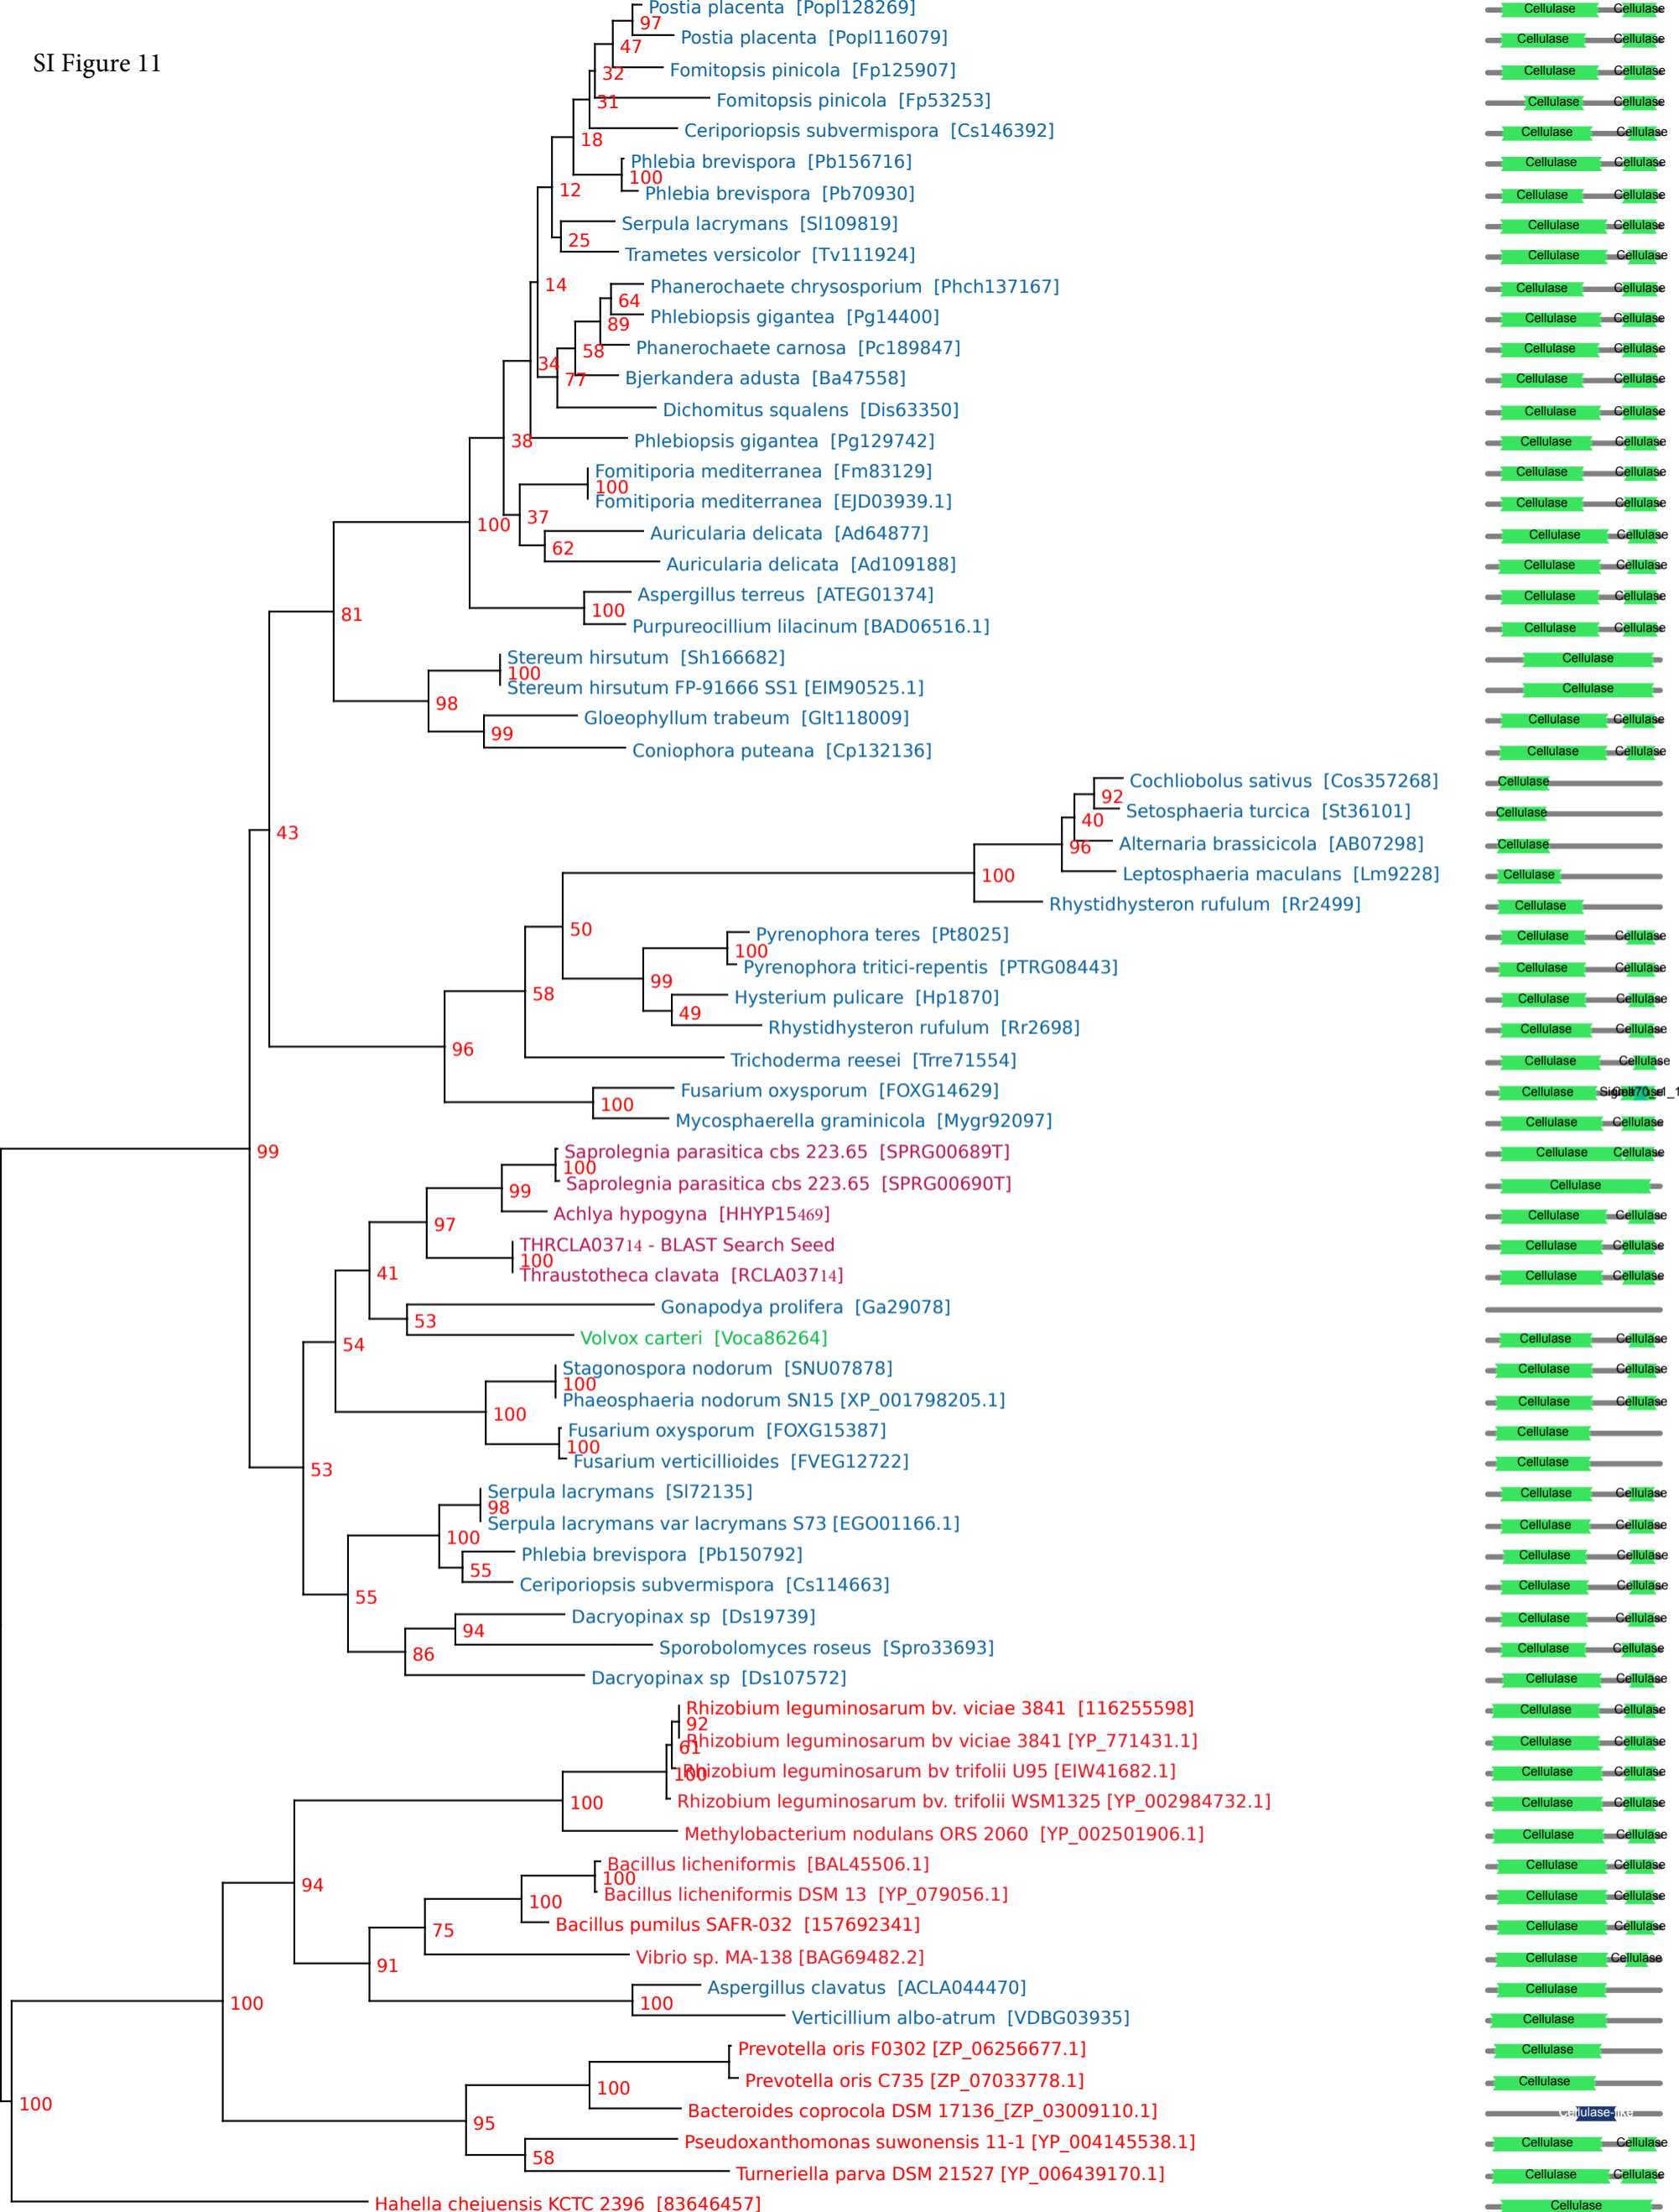

Key  
 viridiplantae  
 metazoa  
 fungi  
 microsporidia  
 stramenopiles  
 bacteria

0.1

SI Figure 12

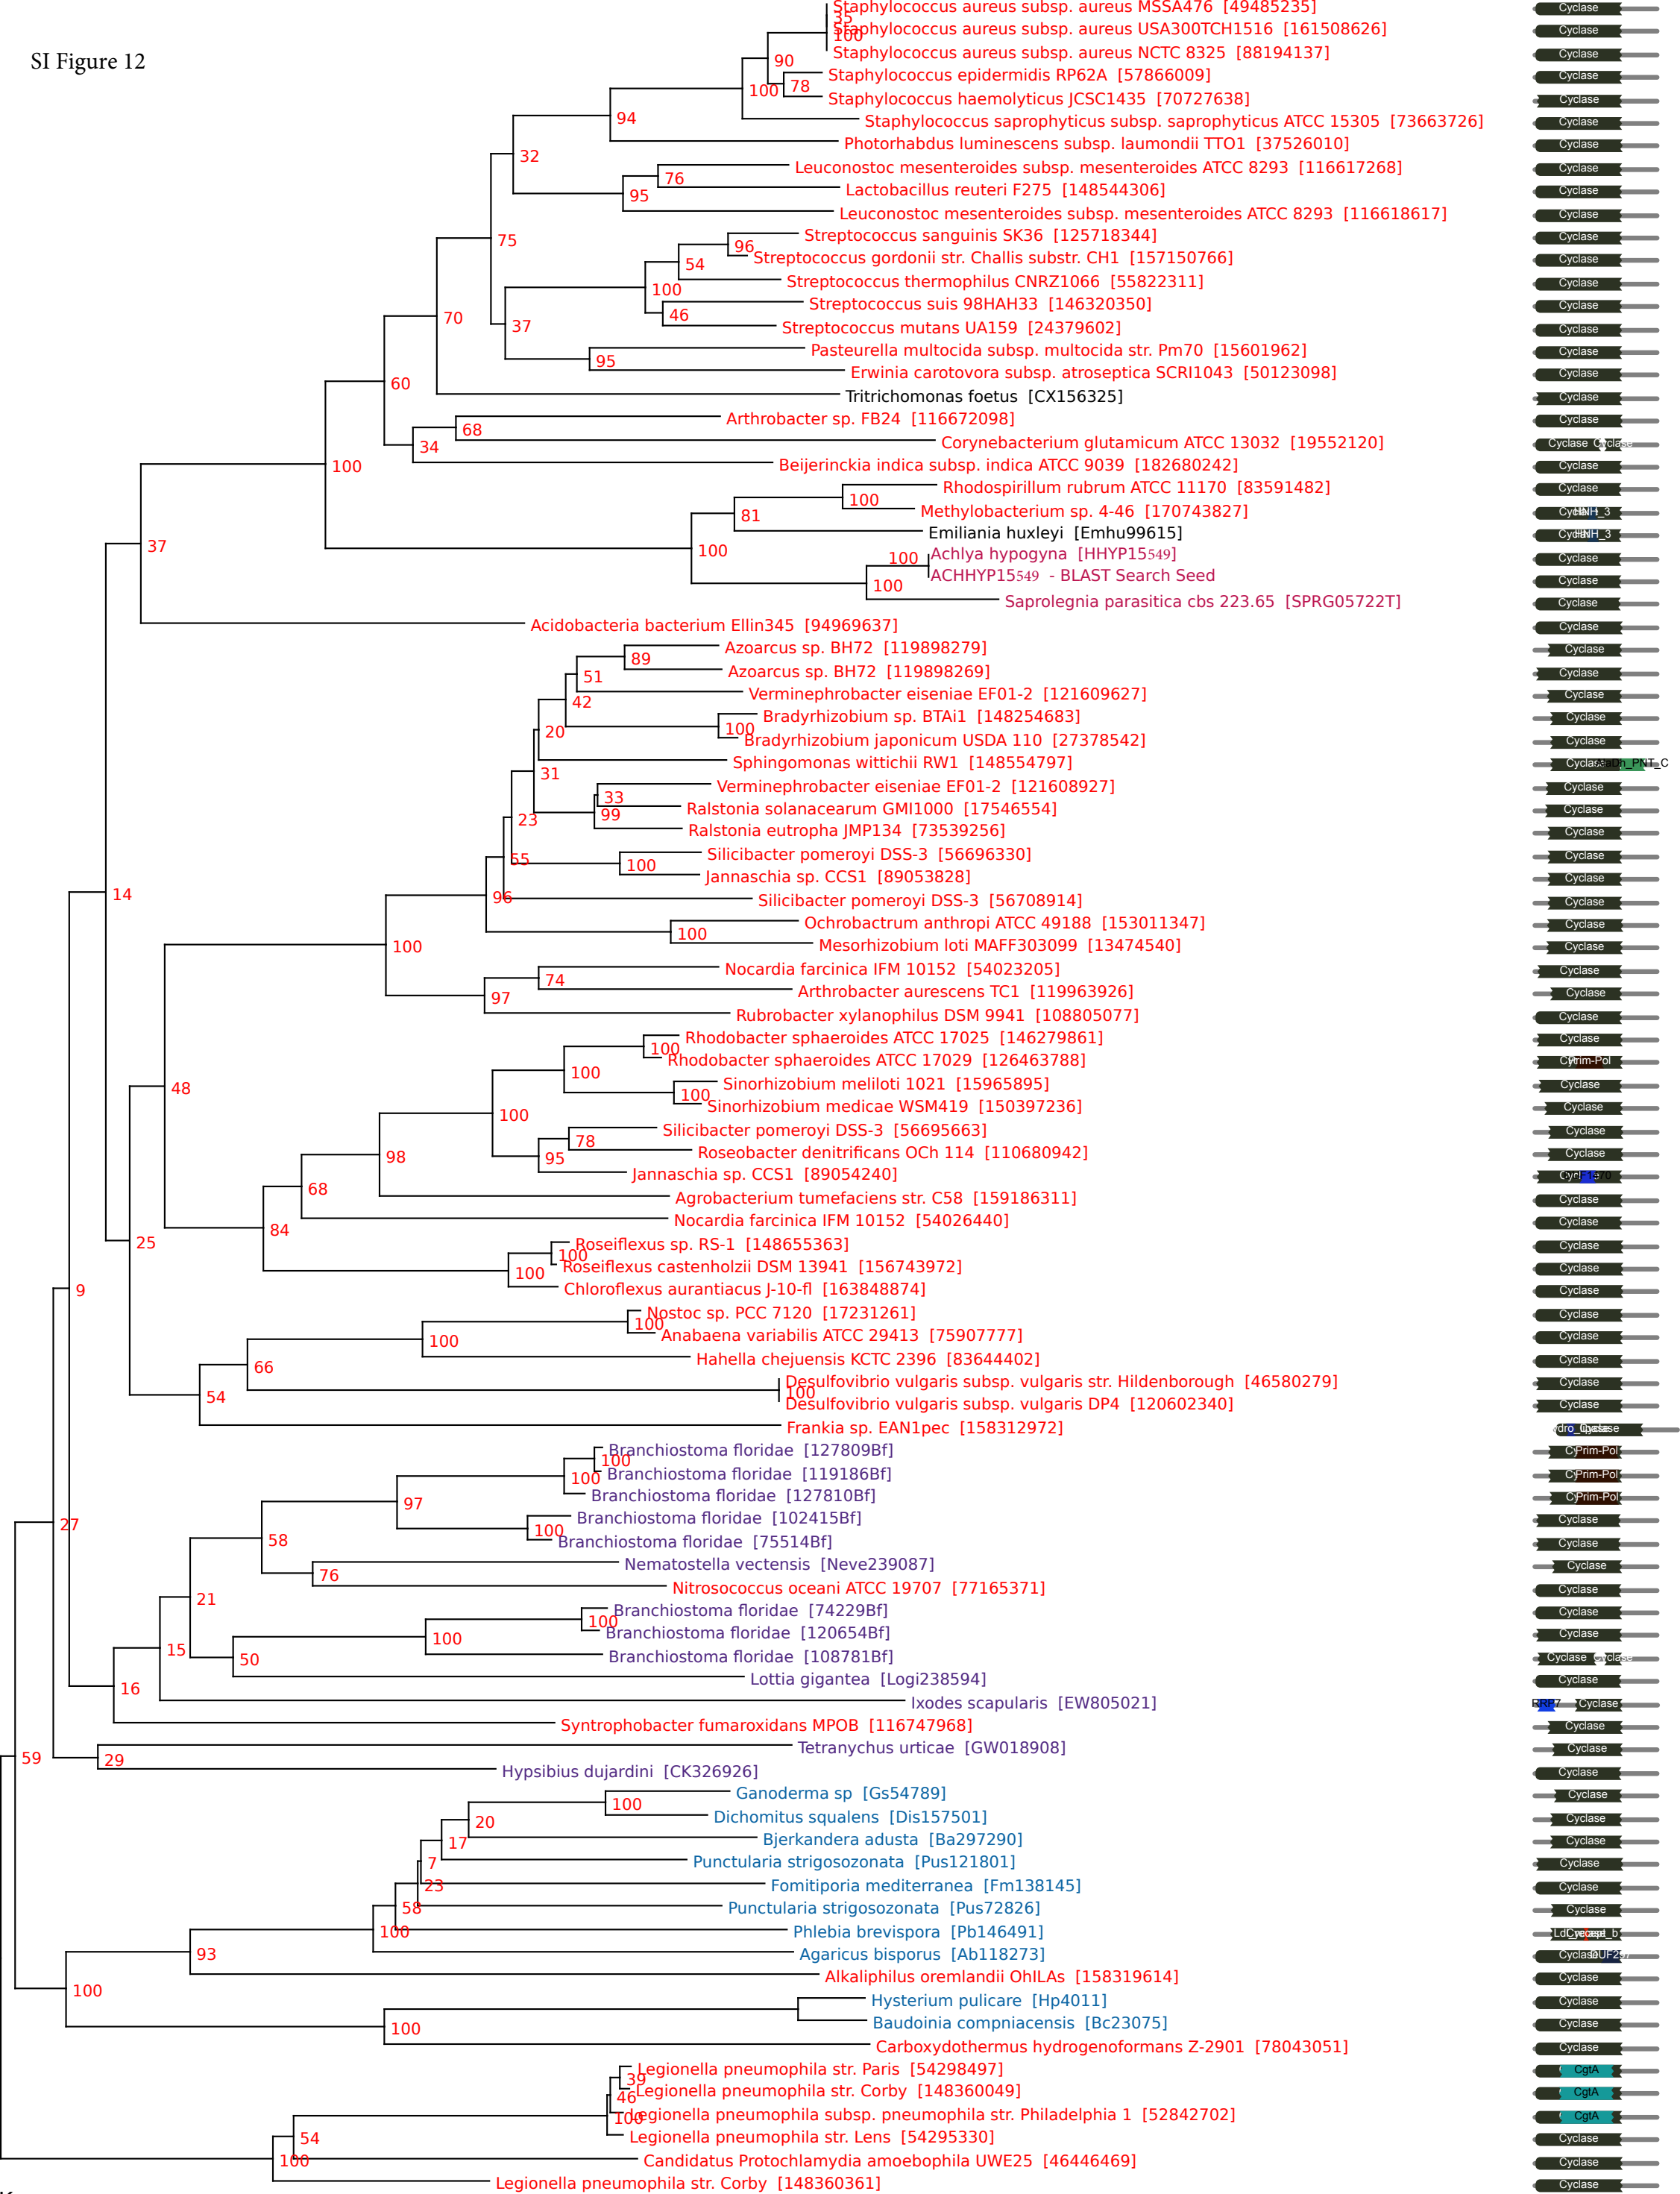

Key

- ascormycota
- basidiomycota
- other fungi
- oomycetes
- other stramenopiles
- metazoa
- bacteria

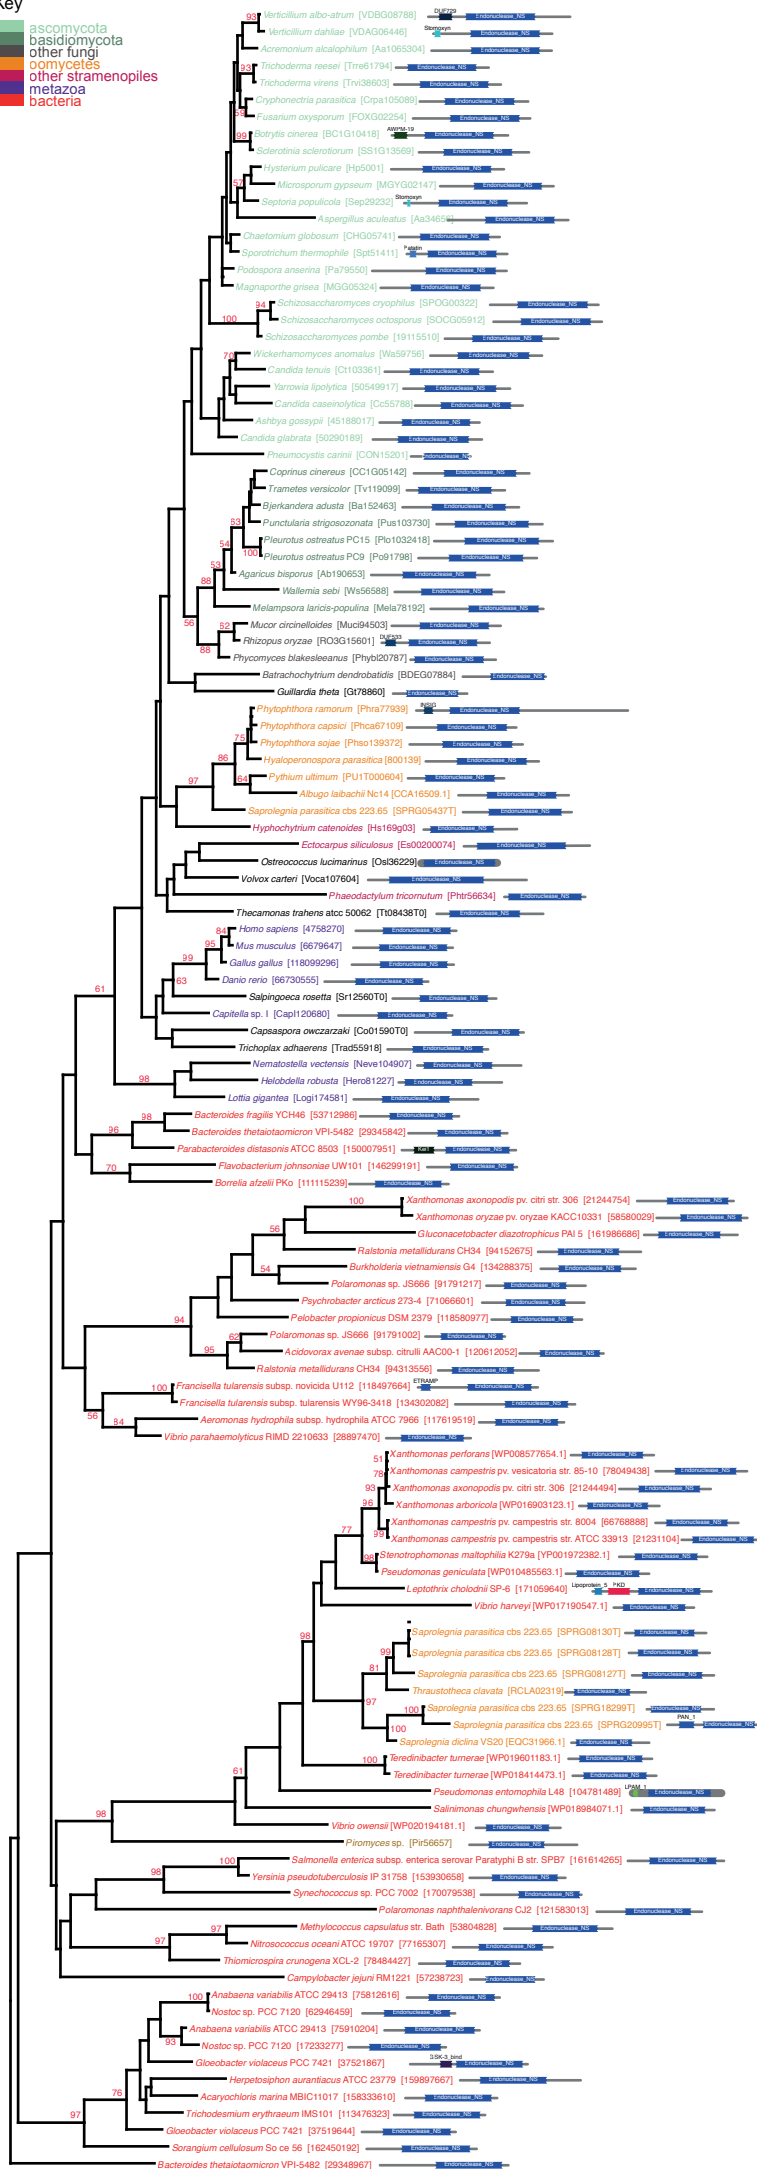

Supplement: supp_evu276_evu276_Figures_GBE.pdf [file supp_evu276_evu276_Figures_GBE.pdf]
